# Supplementary material for: The heart of a hibernator: EGFR and MAPK signaling in cardiac muscle during the hibernation of thirteen-lined ground squirrels, Ictidomys tridecemlineatus
Source: PeerJ. 2019 Sep 5;7:e7587. doi: 10.7717/peerj.7587 (PMC6732209; doi:10.7717/peerj.7587)
Supplement: Supplemental Information 1 — Data values used in study. [file peerj-07-7587-s001.xlsx]

## Sheet: Figure 1
	Sample	EGFR pT654	EGFR pT669	EGFR pY845	EGFR p1045	EGFR pY1068	EGFR pY1086	EGFR pS1047	EGFR total
	13L GS EC1	121.5	42	56	67	235	80	52	83
	13L GS EC2	146	139	77	120	226	83	99	96.5
	13L GS EC3	98	140	51	129.5	357	119.5	98.5	123
	13L GS EC4	55	110	94	110.5	279	93	84	97
	13L GS EN1	142	95	73.5	87	354.5	140	22	167
	13L GS EN2	123.5	142	72.5	111	568	211	109	134
	13L GS EN3	120.5	44.5	106	62	210	132	69	59
	13L GS EN4	76	96.5	71	51.5	300	73.5	138	95
	13L GS IT1	109	63.5	89.5	75	268.5	128	60.5	103
	13L GS IT2	110	100	58	59.5	366.5	88	59	80.5
	13L GS IT3	113.5	124	115	90	422.5	145	85	72
	13L GS IT4	155	121	80	44	525	118	140	66.5
	13L GS EA1	175	133.5	64	95	453	91.5	88.5	109
	13L GS EA2	122	99	50	127	539	155	69	108.5
	13L GS EA3	123	109.5	69	126.5	600.5	165.5	58	67
	13L GS EA4	125	107	88	95	442	145	190.5	95
	13L GS IA1	37.5	112	126	135	620	218	76.5	92.5
	13L GS IA2	79.5	131.5	76.5	79	351	119.5	49.5	67
	13L GS IA 3	96	85	73	108	411.5	92	109	97.5
	13L GS IA 4	71.5	104	61.5	98	421	94	77	78.5
75(1,C10)	Blank	65	69	71	36.5	79	69	113.5	48
	13L GS EC1	1.86923	0.608696	0.788732	1.83562	2.97468	1.15942	0.45815	1.72917
	13L GS EC2	2.24615	2.01449	1.08451	3.28767	2.86076	1.2029	0.872247	2.01042
	13L GS EC3	1.50769	2.02899	0.71831	3.54795	4.51899	1.73188	0.867841	2.5625
	13L GS EC4	0.846154	1.5942	1.32394	3.0274	3.53165	1.34783	0.740088	2.02083
	average	1.61731	1.56159	0.978873	2.92466	3.47152	1.36051	0.734581	2.08073
	StDev	0.595988	0.666496	0.279451	0.75649	0.757337	0.260357	0.194212	0.34844
	SEM	0.148997	0.166624	0.0698628	0.189123	0.189334	0.0650894	0.048553	0.0871099
	13L GS EN1	2.18462	1.37681	1.03521	2.38356	4.48734	2.02899	0.193833	3.47917
	13L GS EN2	1.9	2.05797	1.02113	3.0411	7.18987	3.05797	0.960352	2.79167
	13L GS EN3	1.85385	0.644928	1.49296	1.69863	2.65823	1.91304	0.60793	1.22917
	13L GS EN4	1.16923	1.39855	1	1.41096	3.79747	1.06522	1.21586	1.97917
	average	1.77692	1.36957	1.13732	2.13356	4.53323	2.0163	0.744493	2.36979
	StDev	0.430723	0.57732	0.23753	0.729712	1.925	0.81659	0.443718	0.976781
	SEM	0.107681	0.14433	0.0593826	0.182428	0.481249	0.204148	0.11093	0.244195
	13L GS IT1	1.67692	0.92029	1.26056	2.05479	3.39873	1.85507	0.53304	2.14583
	13L GS IT2	1.69231	1.44928	0.816901	1.63014	4.63924	1.27536	0.519824	1.67708
	13L GS IT3	1.74615	1.7971	1.61972	2.46575	5.3481	2.10145	0.748899	1.5
	13L GS IT4	2.38462	1.75362	1.12676	1.20548	6.64557	1.71014	1.23348	1.38542
	average	1.875	1.48007	1.20599	1.83904	5.00791	1.73551	0.758811	1.67708
	StDev	0.341038	0.403998	0.332574	0.542942	1.35684	0.346692	0.333415	0.334741
	SEM	0.0852594	0.100999	0.0831435	0.135736	0.339209	0.086673	0.0833537	0.0836852
	13L GS EA1	2.69231	1.93478	0.901408	2.60274	5.73418	1.32609	0.779736	2.27083
	13L GS EA2	1.87692	1.43478	0.704225	3.47945	6.82278	2.24638	0.60793	2.26042
	13L GS EA3	1.89231	1.58696	0.971831	3.46575	7.60127	2.39855	0.511013	1.39583
	13L GS EA4	1.92308	1.55072	1.23944	2.60274	5.59494	2.10145	1.67841	1.97917
	average	2.09615	1.62681	0.954225	3.03767	6.43829	2.01812	0.894273	1.97656
	StDev	0.397899	0.215328	0.221318	0.502247	0.949977	0.477033	0.534439	0.410049
	SEM	0.0994747	0.0538321	0.0553295	0.125562	0.237494	0.119258	0.13361	0.102512
	13L GS IA1	0.576923	1.62319	1.77465	3.69863	7.8481	3.15942	0.674009	1.92708
	13L GS IA2	1.22308	1.9058	1.07746	2.16438	4.44304	1.73188	0.436123	1.39583
	13L GS IA 3	1.47692	1.23188	1.02817	2.9589	5.20886	1.33333	0.960352	2.03125
	13L GS IA 4	1.1	1.50725	0.866197	2.68493	5.32911	1.36232	0.678414	1.63542
	average	1.09423	1.56703	1.18662	2.87671	5.70728	1.89674	0.687225	1.7474
	StDev	0.3789	0.279174	0.402272	0.6394	1.48019	0.861118	0.214401	0.288095
	SEM	0.094725	0.0697934	0.100568	0.15985	0.370047	0.215279	0.0536002	0.0720238
	Avgs	EGFR pT654	EGFR pT669	EGFR pY845	EGFR p1045	EGFR pY1068	EGFR pY1086	EGFR pS1047	EGFR total
	13L GS EC1	1	1	1	1	1	1	1	1
	13L GS EN1	1.09869	0.87703	1.16187	0.729508	1.30583	1.48202	1.01349	1.13892
	13L GS IT1	1.15933	0.947796	1.23201	0.628806	1.44257	1.27563	1.03298	0.806008
	13L GS EA1	1.29608	1.04176	0.97482	1.03864	1.8546	1.48336	1.21739	0.949937
	13L GS IA1	0.676576	1.00348	1.21223	0.983607	1.64403	1.39414	0.935532	0.8398
	SEM
	13L GS EC1	0.0921266	0.106701	0.0713706	0.0646649	0.0545393	0.047842	0.0660961	0.0418651
	13L GS EN1	0.0665803	0.0924248	0.0606642	0.0623758	0.138628	0.150053	0.151011	0.11736
	13L GS IT1	0.0527169	0.0646771	0.084938	0.0464108	0.0977121	0.0637064	0.113471	0.0402192
	13L GS EA1	0.0615064	0.0344725	0.0565237	0.0429321	0.0684122	0.0876572	0.181886	0.0492675
	13L GS IA1	0.0585695	0.0446937	0.102739	0.054656	0.106595	0.158235	0.0729669	0.0346147

## Sheet: Figure 2
		Blank subtracted values		JNK	Bad	Akt	Caspase 9
			EC1	367	264		23.5
			EC3	152	280	12.5	6
			EC4	156	234		2.5
			EC5	313.5	262	13	42
			EC6	300	302	13.5
			average	257.7	268.4	13	18.5
			Stdev	97.9347	25.036	0.5	18.1613
			SEM	43.7977	11.1964	0.288675	9.08066
			%error	16.9956	4.17155	2.22058	49.0846			JNK	Bad	Akt	Caspase 9
			EN1	86	44	9.5	6.5		EC	1	1	1	1
			EN3	117	32	10.5	19		EN	0.535506	0.206781	0.538462	0.601351
			EN4	171	71	3.5	11.5		LT	0.865832	0.0639593	0.711538	0.864865
			EN5	178	75	4.5	7.5		IA	0.597594	0.271051	0.519231	2.47973
			average	138	55.5	7	11.125
			Stdev	44.0984	20.8567	3.51188	5.67707
			SEM	22.0492	10.4283	1.75594	2.83854			EC	EN	LT	IA
			%error	15.9777	18.7898	25.0849	25.5149		JNK	1	0.535506	0.865832	0.597594
			LT1	320	7.5	7.5	28		Bad	1	0.206781	0.0639593	0.271051
			LT2	265.5		13.5	23		Akt	1	0.538462	0.711538	0.519231
			LT3	167	34	6.5	10		Caspase 9	1	0.601351	0.864865	2.47973
			LT4	140	10	9.5	3
			average	223.125	17.1667	9.25	16
			Stdev	84.1431	14.6316	3.0957	11.5181
			SEM	42.0716	8.44755	1.54785	5.75905
			%error	18.8556	49.209	16.7335	35.9941
			IA1	175	71	9.5	47.5
			IA2	137	55	3.5	50.5
			IA3		84	6.5	48.5
			IA4	150	81	7.5	37
			average	154	72.75	6.75	45.875
			Stdev	19.3132	13.0735	2.5	6.04669
			SEM	11.1505	6.53676	1.25	3.02335
			%error	7.24058	8.98523	18.5185	6.5904

## Sheet: FIgure 3a
		EC	EC SEM	EN	EN SEM	LT	LT SEM	EA	EA SEM	IA	IA SEM
	p-MSK1	1	0.3193	1.2169	0.1323	1.1654	0.1328	1.1054	0.0973	1.0735	0.0949
	p-CREB1	1	0.0407	0.974	0.0951	0.8696	0.1187	1.0015	0.0676	1.2748	0.0859
	p-ELK1	1	0.2307	0.9504	0.1897	1.2791	0.082	1.2791	0.0357	0.2276	0.0274
	p-c-Jun	1	0.1606	0.9688	0.098	1.0945	0.0982	1.1373	0.1022	0.8901	0.139
	p-ATF2	1	0.3131	1.2843	0.0774	1.5539	0.1444	1.4039	0.1854	1.3775	0.1127
	p-p53	1	0.2093	0.9467	0.0528	1.0571	0.0627	1.0743	0.1105	0.8959	0.0663

## Sheet: Figure3b
heart
p-CREB S133
	Raw vol.	Quantity	Background level			Raw vol.	Quantity	Background level			ECL	COM	ECL/COM	AVE	STDEV	SEM
EC1	305165	1	497.853		EC1	2954376	1	2007.19			1	1	1
EC2	385854	1.26441	556.61		EC2	3751567	1.26983	2025.72			1.26441	1.26983	0.995728
EC3	322600	1.05713	575.172		EC3	2770266	0.937682	1954.07			1.05713	0.937682	1.12739
EC4	257603	0.844142	599.835		EC4	2681052	0.907485	1902.34			0.844142	0.907485	0.930199	1.01333	0.082478	0.041239		1	0.0406965
EN1	483714	1.58509	652.881		EN1	4026350	1.36284	1898.53			1.58509	1.36284	1.16308
EN2	409648	1.34238	682.553		EN2	3805911	1.28823	1857.33			1.34238	1.28823	1.04204
EN3	361059	1.18316	675.032		EN3	3391742	1.14804	1863.79			1.18316	1.14804	1.03059
EN4	270921	0.887785	655.321		EN4	3683612	1.24683	1846.29			0.887785	1.24683	0.712033	0.986934	0.19282	0.0964102		0.973952	0.095142
LT1	297872	0.976103	650.78		LT1	2891045	0.978564	1757.35			0.976103	0.978564	0.997485
LT2	240100	0.786789	625.014		LT2	3271161	1.10723	1730.69			0.786789	1.10723	0.710595											AVE	SEM
LT3	185072	0.606466	646.626		LT3	2740321	0.927546	1759.83			0.606466	0.927546	0.653839										EC	1	0.0406965
LT4	528302	1.7312	590.642		LT4	4397706	1.48854	1779.82			1.7312	1.48854	1.16302	0.881235	0.240655	0.120327		0.869643	0.118745				EN	0.973952	0.095142
																							LT	0.869643	0.118745
	Raw vol.	Quantity	Background level			Raw vol.	Quantity	Background level			ECL	COM	ECL/COM	AVE	STDEV	SEM							EA	1.00145	0.0675784
EC1	307727	1	516.56		EC1	3794730	1	2170.39			1	1	1										IA	1.27484	0.08589
EC2	323005	1.04965	559.335		EC2	4155261	1.09501	2108.06			1.04965	1.09501	0.958575
EC3	292920	0.951881	563.51		EC3	3838686	1.01158	2027.16			0.951881	1.01158	0.940981
EC4	264771	0.860408	569.657		EC4	3172886	0.83613	1960.87			0.860408	0.83613	1.02904	0.982148	0.039865	0.0199325		1	0.0202948
EA1	315930	1.02666	595.097		EA1	3736198	0.984575	1906.31			1.02666	0.984575	1.04274
EA2	227707	0.739963	618.985		EA2	3578445	0.943004	1899.75			0.739963	0.943004	0.784687
EA3	313446	1.01859	642.047		EA3	3685921	0.971326	1903.56			1.01859	0.971326	1.04865
EA4	293332	0.953223	693.153		EA4	3418243	0.900787	1947.4			0.953223	0.900787	1.05821	0.983573	0.132744	0.066372		1.00145	0.0675784
IA1	284345	0.924016	719.705		IA1	3364566	0.886642	1969.26			0.924016	0.886642	1.04215
IA2	392222	1.27458	753.18		IA2	3875247	1.02122	1964.72			1.27458	1.02122	1.24809
IA3	355203	1.15428	783.484		IA3	3467926	0.91388	1945.83			1.15428	0.91388	1.26305
IA4	558308	1.8143	685.689		IA4	4731715	1.24692	1821.51			1.8143	1.24692	1.45503	1.25208	0.168713	0.0843567		1.27484	0.08589
elk1
	Raw vol.	Quantity	Background level			Raw vol.	Quantity	Background level
EA1	539202	1.82597	406.836		EA1	16295280	1.15155	8617.13		EA1	1.82597	1.15155	1.58567
EA2	383600	1.29904	406.836		EA2	17627900	1.24572	7894.48		EA2	1.29904	1.24572	1.0428
EA3	236815	0.801958	445.716		EA3	15696740	1.10925	7370.49		EA3	0.801958	1.10925	0.722974	1.11715	0.436127	0.251798		1.07043	0.241268
IA1	77941.9	0.263945	455.174		IA1	15881800	1.12233	6876.47		IA1	0.263945	1.12233	0.235177
IA2	48214.5	0.163275	460.487		IA2	15701580	1.10959	6333.17		IA2	0.163275	1.10959	0.147149
IA3	57185.3	0.193654	448.095		IA3	18446700	1.30358	6065.13		IA3	0.193654	1.30358	0.148556
IA4	68066	0.230501	451.901		IA4	15393400	1.08781	6156.52		IA4	0.230501	1.08781	0.211894	0.185694	0.0447213	0.0223606		0.177929	0.0214256			EC	1	0.230683
LT1	295296	1	482.161		LT1	14150792	1	6207.4		LT1	1	1	1									EN	1.18767	0.200342
LT2	368409	1.24759	522.493		LT2	15908348	1.1242	6587.11		LT2	1.24759	1.1242	1.10976									LT	1.27905	0.0819753
LT3	231983	0.785595	522.493		LT3	10886308	0.769307	6707.26		LT3	0.785595	0.769307	1.02117									EA	1.27905	0.0356808
LT4	279665	0.947067	527.257		LT4	18367100	1.29796	7296.04		LT4	0.947067	1.29796		1.04364	0.0582276	0.0291138		1	0.0278963			IA	0.22758	0.0274044
											1.55167	1	1.55167
											0.396853	1.08319	0.366375
											0.656796	0.945402	0.694726
	Raw vol.	Quantity	Background level			Raw vol.	Quantity	Background level			0.31088	0.669995	0.464003
EC1	2.20394e+06	1.46408	415.913		EC1	16273488	0.966554	10122.2		EC1	1.46408	0.966554	1.51474
EC2	757339	0.503101	415.913		EC2	14933576	0.886971	9462.11		EC2	0.503101	0.886971	0.567213
EC3	855016	0.567988	415.913		EC3	16902980	1.00394	8787.52		EC3	0.567988	1.00394	0.565758	0.817784	0.499119	0.188649		0.781829	0.180355
EN1	687119	0.456454	415.913		EN1	11949272	0.70972	8479.04		EN1	0.456454	0.70972	0.643147
EN2	1.09275e+06	0.725917	415.913		EN2	21960608	1.30434	8901		EN2	0.725917	1.30434	0.556541
EN3	1.82136e+06	1.20993	415.913		EN3	17994248	1.06876	8596.67		EN3	1.20993	1.06876	1.13209
EN4	2.11942e+06	1.40793	415.913		EN4	15261508	0.906448	8150.92		EN4	1.40793	0.906448	1.55324	0.971255	0.463399	0.163836		0.928552	0.156633
LT1	1.50534e+06	1	415.913		LT1	16836604	1	7681.87		LT1	1	1	1
LT2	1.56406e+06	1.03901	415.913		LT2	14614264	0.868005	7657.8		LT2	1.03901	0.868005	1.19701
LT3	1.23852e+06	0.822751	415.913		LT3	14721492	0.874374	7749.95		LT3	0.822751	0.874374	0.940959
LT4	1.58237e+06	1.05117	415.913		LT4	22316964	1.3255	7456.95		LT4	1.05117	1.3255		1.04599	0.134076	0.0670381		1	0.0640906

## Sheet: Figure 4
	EC	EC SEM	EN	EN SEM	LT	LTSEM	EA	EA SEM	IA	IA SEM
p-MEK1	1	0.1736	1.1452	0.113	1.1754	0.0732	1.1199	0.0928	1.0939	0.1364
p-ERK1/2	1	0.1717	0.2161	0.0237	0.2629	0.031	3.6823	1.1892	0.721	0.1234
p-JNK	1	0.0858	0.5189	0.0708	0.7433	0.0344	1.6768	0.3564	0.6975	0.0516
p-p38	1	0.2464	1.1845	0.039	3.0268	0.4289	8.5458	0.6648	1.067	0.1783

## Sheet: Figure 5
	EC	ECSEM	EN	EN SEM	LT	LT SEM	EA	EA SEM	IA	SEM			HSP27	SEM	n		p-HSP27	SEM	n			HSP60	SEM	N
HSP27	1	0.1596	1.1258	0.1422	0.5691	0.0263	0.7788	0.1231	0.7388	0.0817		EC	1	0.1596	3		1	0.2008	4			1	0.0775	3
p-HSP27 (S78)	1	0.2008	0.5966	0.0761	1.2256	0.1033	0.7694	0.0664	1.2097	0.1377		EN	1.1258	0.1422	3		0.5966	0.0761	4			1.0149	0.1468	3
p-HSP27 (S78/S82)	1	0.1039	1.1124	0.133	0.8798	0.0276	1.0631	0.1424	0.9764	0.0379		LT	0.5691	0.0263	4		1.2256	0.1033	4			0.6928	0.0294	4
HSP60	1	0.0775	1.0149	0.1468	0.6928	0.0294	0.8384	0.0984	1.0706	0.1085		EA	0.7788	0.1231	4		0.7694	0.0664	4			0.8384	0.0984	3
HSP70 (HSP72)	1	0.0978	1.2037	0.0576	0.9439	0.0866	1.1122	0.0207	1.0951	0.09		IA	0.7388	0.0817	4		1.2097	0.1377	4			1.0706	0.1085	4
HSP90 alpha	1	0.1102	1.0881	0.094	0.9644	0.0666	1.1614	0.1009	1.0042	0.0959
n values for HSP	3		3		4		4		4
